# Supplementary material
Source: PubMed Central journal article supplement (PMC1885632)

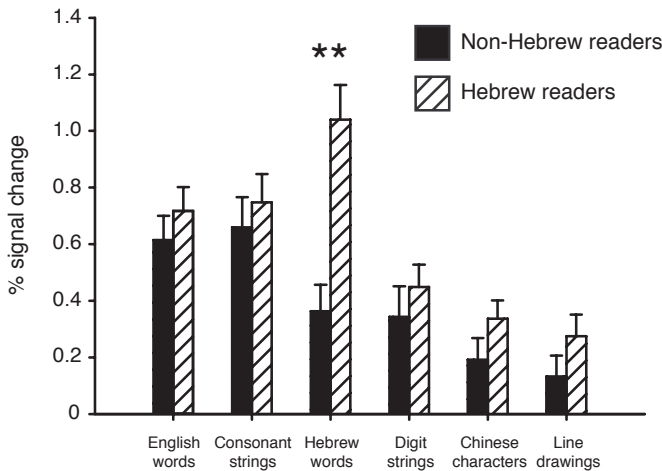

Supplement: pnas_0703300104_1.pdf [file pnas_0703300104_1.pdf]

**A**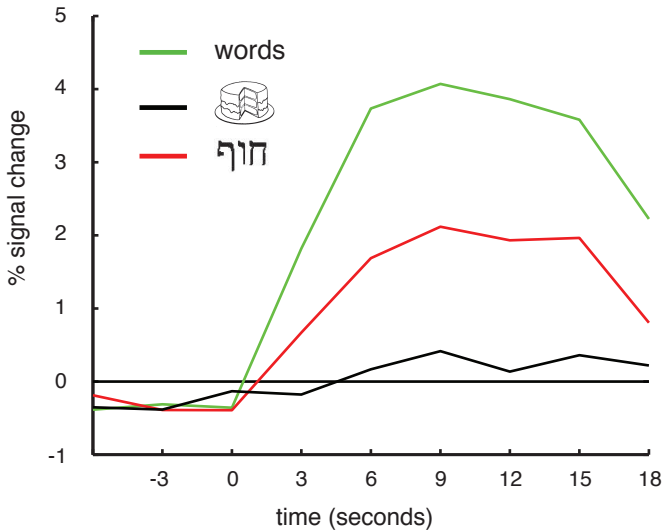

Supplement: pnas_0703300104_2.pdf [file pnas_0703300104_2.pdf]

**B**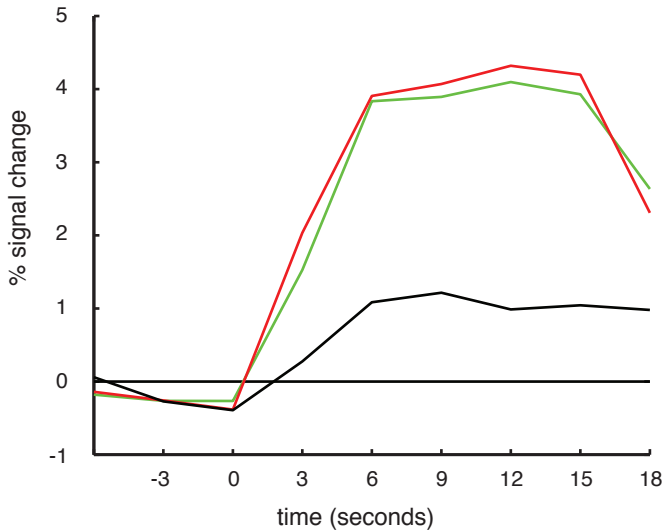

Supplement: pnas_0703300104_3.pdf [file pnas_0703300104_3.pdf]

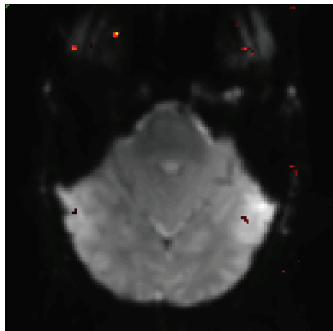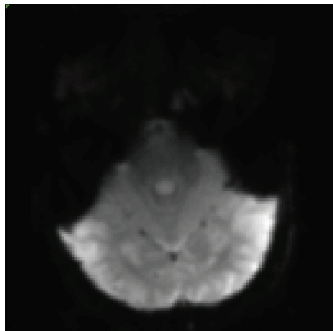

יִלְדָּה > 

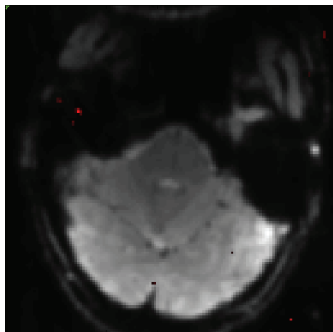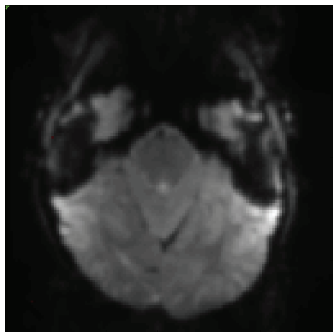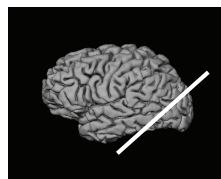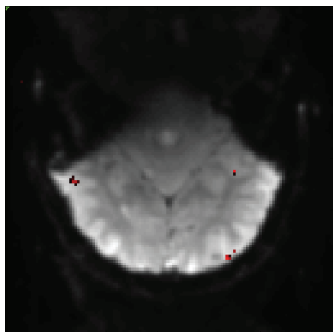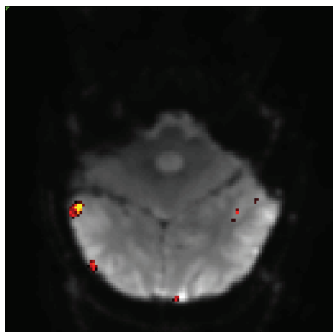

$p < 10^{-7}$

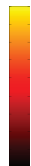

$p < 10^{-4}$

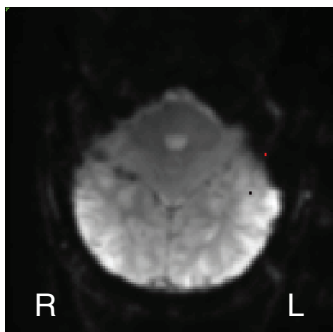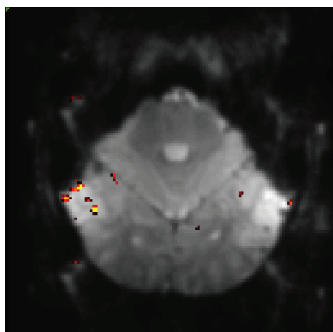

Supplement: pnas_0703300104_4.pdf [file pnas_0703300104_4.pdf]

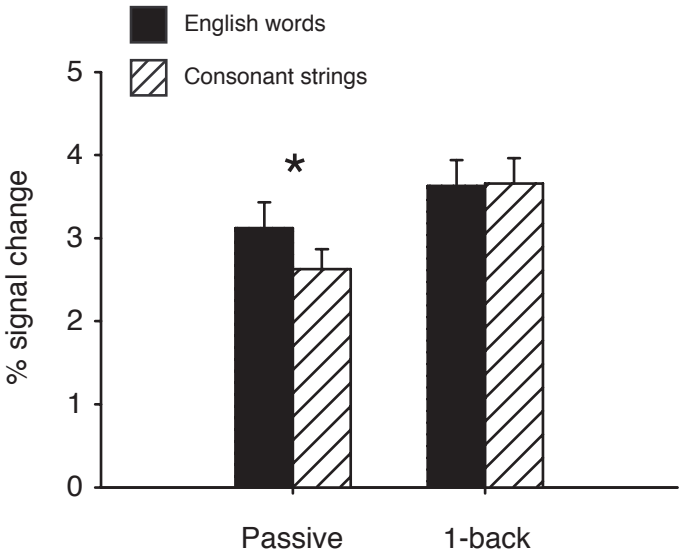

Supplement: pnas_0703300104_5.pdf [file pnas_0703300104_5.pdf]
